# Supplementary material
Source: Springer Nature journal article supplement (https://www.springermedizin.de/resource/supplementary/12993_2010_280_MOESM3_ESM.pdf/9617446)

**(A)**

Pretraining

Target

Distractor

No Square

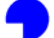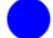

With Square

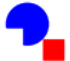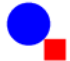

Test

Target

Distractor

Control

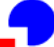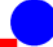

Gap

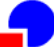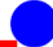

Occluded

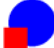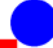**(B)**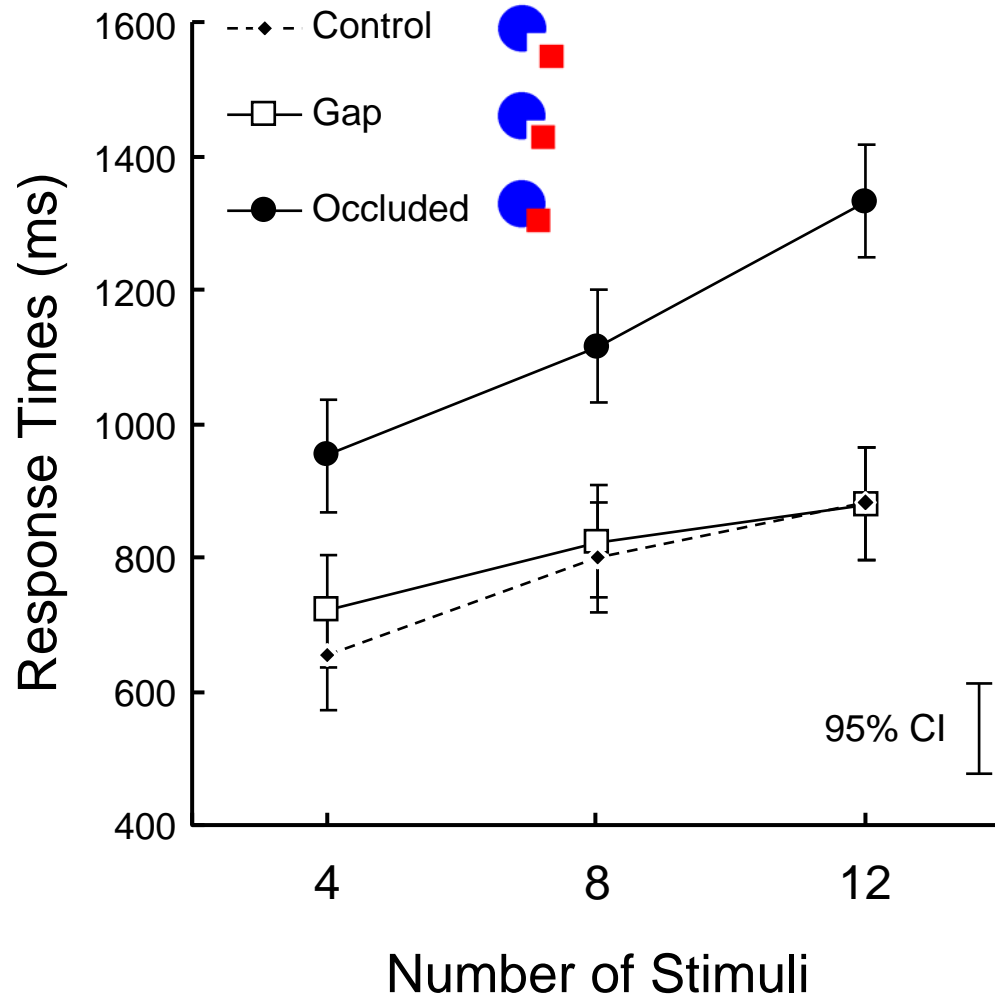

Supplement: MOESM3 [file 9617446]
